# Supplementary material for: CHD4 slides nucleosomes by decoupling entry- and exit-side DNA translocation
Source: PubMed Central journal article supplement (PMC7090039; doi:10.1038/s41467-020-15183-2), 2020-03-23
Supplement: 41467_2020_15183_MOESM3_ESM.pdf [file 41467_2020_15183_MOESM3_ESM.pdf]

## Description of Additional Supplementary Files

File Name: Supplementary Movie 1

Description: 3D animation showing the proposed nucleosome remodelling mechanism of CHD4.
